# Supplementary material for: Exploring the experiences of healthcare practitioners regarding the palliative care needs of women receiving palliative chemotherapy for breast cancer in Ghana
Source: Research Square preprint supplement (doi:10.21203/rs.3.rs-6572470/v1), 2025-06-09
Supplement: Supplementary file 1 [file b6e354c79e8e1a6c3a3af19f.docx]

**Section A: Biographic Dat**

**Age…………………………………………………………………………**

**Gender………………………………………………………………………**

**Professional designation…………………………………………………….**

**Level of education/qualification…………………………………………….**

**Duration of employment …………………………………………………….**

**Section B: Semi-structured interview guide**

1. What has been your emotional experience while caring for women undergoing palliative chemotherapy?

Probe: Can you share a particular situation that deeply affected you emotionally?

1. How has this role impacted your physical health or energy levels?
2. In what ways has your work affected your psychological or social life

Probe: family, friends, mental well-being?

1. How do you personally cope with the emotional and physical demands of caring for these patients?
2. What motivates or keeps you focused on your goals despite the challenges in cancer care?
3. What kinds of support help you cope in your role?

Probe: (from peers, management, family, etc.)

1. What are the major challenges you face in delivering palliative care to these women?

Probe: Are there any issues around advocating for patients’ needs?

1. How would you describe the level of awareness or understanding of palliative care among patients and the public?
2. What resource limitations affect your ability to provide care?

Probe: staffing, drugs, infrastructure.

1. How do cultural beliefs influence your communication with patients and families about palliative care?
2. What are the most common symptoms that women report during palliative chemotherapy?

Probe: How do you manage these symptoms, particularly pain?

1. How do you address their psychological or emotional needs?
2. Are there provisions for spiritual support in your facility, and how important is this for patients?
3. How do you approach issues of sexuality or intimacy with these patients?
4. In your view, what changes or improvements are needed in the current system to better support women receiving palliative chemotherapy for breast cancer?
5. Is there anything else you would like to add that I haven’t ask you?
